# Supplementary material for: Itaconate ameliorates methicillin-resistant Staphylococcus aureus-induced acute lung injury through the Nrf2/ARE pathway
Source: PubMed Central journal article supplement — Ann Transl Med. 2021 Apr;9(8):712. doi: 10.21037/atm-21-1448 (PMC8106008; doi:10.21037/atm-21-1448), 2021-04
Supplement: atm-09-08-712-coif.pdf [file atm-09-08-712-coif.pdf]

## ICMJE DISCLOSURE FORM

**Date:** April 11, 2021

**Your Name:** Gang Liu

**Manuscript Title:** Itaconate ameliorates methicillin-resistant *Staphylococcus aureus*-induced acute lung injury through the Nrf2/ARE pathway

**Manuscript number (if known):** ATM-21-1448

In the interest of transparency, we ask you to disclose all relationships/activities/interests listed below that are related to the content of your manuscript. "Related" means any relation with for-profit or not-for-profit third parties whose interests may be affected by the content of the manuscript. Disclosure represents a commitment to transparency and does not necessarily indicate a bias. If you are in doubt about whether to list a relationship/activity/interest, it is preferable that you do so.

The following questions apply to the author's relationships/activities/interests as they relate to the current manuscript only.

The author's relationships/activities/interests should be defined broadly. For example, if your manuscript pertains to the epidemiology of hypertension, you should declare all relationships with manufacturers of antihypertensive medication, even if that medication is not mentioned in the manuscript.

In item #1 below, report all support for the work reported in this manuscript without time limit. For all other items, the time frame for disclosure is the past 36 months.

|                                                           |                                                                                                                                                                                | Name all entities with whom you have this relationship or indicate none (add rows as needed)                                                                                                                                                                                                                                             | Specifications/Comments (e.g., if payments were made to you or to your institution) |
|-----------------------------------------------------------|--------------------------------------------------------------------------------------------------------------------------------------------------------------------------------|------------------------------------------------------------------------------------------------------------------------------------------------------------------------------------------------------------------------------------------------------------------------------------------------------------------------------------------|-------------------------------------------------------------------------------------|
| <b>Time frame: Since the initial planning of the work</b> |                                                                                                                                                                                |                                                                                                                                                                                                                                                                                                                                          |                                                                                     |
| 1                                                         | All support for the present manuscript (e.g., funding, provision of study materials, medical writing, article processing charges, etc.)<br><b>No time limit for this item.</b> | National Natural Science Foundation of China<br>No. 81871518<br><br>National Natural Science Foundation of China<br>No. 81901522<br><br>China Postdoctoral Science Foundation<br>No. 2019M661730<br><br>China Postdoctoral Science Foundation<br>No. 2020M671347<br><br>Natural Science Foundation of Jiangsu Province<br>No. BK20200602 |                                                                                     |

|                                   |                                                                                                              |                                                                                                       |  |
|-----------------------------------|--------------------------------------------------------------------------------------------------------------|-------------------------------------------------------------------------------------------------------|--|
|                                   |                                                                                                              | Natural Science Foundation of Jiangsu Province<br>No. BE2020634                                       |  |
|                                   |                                                                                                              | Natural Science Foundation of Jiangsu Province<br>No. BK20191138                                      |  |
|                                   |                                                                                                              | Fundamental Research Funds for the Central Universities<br>No. JUSRP11955                             |  |
|                                   |                                                                                                              | Top Talent Support Program for Young and Middle-aged People of Wuxi Health Committee<br>No. BJ2020049 |  |
|                                   |                                                                                                              | Wuxi Commission of Health<br>No. T201824                                                              |  |
| <b>Time frame: past 36 months</b> |                                                                                                              |                                                                                                       |  |
| 2                                 | Grants or contracts from any entity (if not indicated in item #1 above).                                     | None                                                                                                  |  |
| 3                                 | Royalties or licenses                                                                                        | None                                                                                                  |  |
| 4                                 | Consulting fees                                                                                              | None                                                                                                  |  |
| 5                                 | Payment or honoraria for lectures, presentations, speakers bureaus, manuscript writing or educational events | None                                                                                                  |  |
| 6                                 | Payment for expert testimony                                                                                 | None                                                                                                  |  |
| 7                                 | Support for attending meetings and/or travel                                                                 | None                                                                                                  |  |
| 8                                 | Patents planned, issued or pending                                                                           | None                                                                                                  |  |
| 9                                 | Participation on a Data Safety Monitoring Board or Advisory Board                                            | None                                                                                                  |  |
| 10                                | Leadership or fiduciary role in other board, society,                                                        | None                                                                                                  |  |

|    |                                                                                  |      |  |
|----|----------------------------------------------------------------------------------|------|--|
|    | committee or advocacy group, paid or unpaid                                      |      |  |
| 11 | Stock or stock options                                                           | None |  |
|    |                                                                                  |      |  |
|    |                                                                                  |      |  |
| 12 | Receipt of equipment, materials, drugs, medical writing, gifts or other services | None |  |
|    |                                                                                  |      |  |
|    |                                                                                  |      |  |
| 13 | Other financial or non-financial interests                                       | None |  |
|    |                                                                                  |      |  |
|    |                                                                                  |      |  |

**Please summarize the above conflict of interest in the following box:**

This study was supported by National Natural Science Foundation of China (No. 81871518 and 81901522), the China Postdoctoral Science Foundation (No. 2019M661730 and 2020M671347), the Natural Science Foundation of Jiangsu Province (No. BK20200602, BE2020634, and BK20191138), the Fundamental Research Funds for the Central Universities (No. JUSRP11955), the Top Talent Support Program for Young and Middle-aged People of Wuxi Health Committee (No. BJ2020049), and the Wuxi Commission of Health (No. T201824) .

**Please place an “X” next to the following statement to indicate your agreement:**

**X   I certify that I have answered every question and have not altered the wording of any of the questions on this form.**

## ICMJE DISCLOSURE FORM

**Date:** April 11, 2021

**Your Name:** Yaxian Wu

**Manuscript Title:** Itaconate ameliorates methicillin-resistant *Staphylococcus aureus*-induced acute lung injury through the Nrf2/ARE pathway

**Manuscript number (if known):** ATM-21-1448

In the interest of transparency, we ask you to disclose all relationships/activities/interests listed below that are related to the content of your manuscript. "Related" means any relation with for-profit or not-for-profit third parties whose interests may be affected by the content of the manuscript. Disclosure represents a commitment to transparency and does not necessarily indicate a bias. If you are in doubt about whether to list a relationship/activity/interest, it is preferable that you do so.

The following questions apply to the author's relationships/activities/interests as they relate to the current manuscript only.

The author's relationships/activities/interests should be defined broadly. For example, if your manuscript pertains to the epidemiology of hypertension, you should declare all relationships with manufacturers of antihypertensive medication, even if that medication is not mentioned in the manuscript.

In item #1 below, report all support for the work reported in this manuscript without time limit. For all other items, the time frame for disclosure is the past 36 months.

|                                                           |                                                                                                                                                                                | Name all entities with whom you have this relationship or indicate none (add rows as needed)                                                                                                                                                                                                                                             | Specifications/Comments (e.g., if payments were made to you or to your institution) |
|-----------------------------------------------------------|--------------------------------------------------------------------------------------------------------------------------------------------------------------------------------|------------------------------------------------------------------------------------------------------------------------------------------------------------------------------------------------------------------------------------------------------------------------------------------------------------------------------------------|-------------------------------------------------------------------------------------|
| <b>Time frame: Since the initial planning of the work</b> |                                                                                                                                                                                |                                                                                                                                                                                                                                                                                                                                          |                                                                                     |
| 1                                                         | All support for the present manuscript (e.g., funding, provision of study materials, medical writing, article processing charges, etc.)<br><b>No time limit for this item.</b> | National Natural Science Foundation of China<br>No. 81871518<br><br>National Natural Science Foundation of China<br>No. 81901522<br><br>China Postdoctoral Science Foundation<br>No. 2019M661730<br><br>China Postdoctoral Science Foundation<br>No. 2020M671347<br><br>Natural Science Foundation of Jiangsu Province<br>No. BK20200602 |                                                                                     |

|                                   |                                                                                                              |                                                                                                       |  |
|-----------------------------------|--------------------------------------------------------------------------------------------------------------|-------------------------------------------------------------------------------------------------------|--|
|                                   |                                                                                                              | Natural Science Foundation of Jiangsu Province<br>No. BE2020634                                       |  |
|                                   |                                                                                                              | Natural Science Foundation of Jiangsu Province<br>No. BK20191138                                      |  |
|                                   |                                                                                                              | Fundamental Research Funds for the Central Universities<br>No. JUSRP11955                             |  |
|                                   |                                                                                                              | Top Talent Support Program for Young and Middle-aged People of Wuxi Health Committee<br>No. BJ2020049 |  |
|                                   |                                                                                                              | Wuxi Commission of Health<br>No. T201824                                                              |  |
| <b>Time frame: past 36 months</b> |                                                                                                              |                                                                                                       |  |
| 2                                 | Grants or contracts from any entity (if not indicated in item #1 above).                                     | None                                                                                                  |  |
| 3                                 | Royalties or licenses                                                                                        | None                                                                                                  |  |
| 4                                 | Consulting fees                                                                                              | None                                                                                                  |  |
| 5                                 | Payment or honoraria for lectures, presentations, speakers bureaus, manuscript writing or educational events | None                                                                                                  |  |
| 6                                 | Payment for expert testimony                                                                                 | None                                                                                                  |  |
| 7                                 | Support for attending meetings and/or travel                                                                 | None                                                                                                  |  |
| 8                                 | Patents planned, issued or pending                                                                           | None                                                                                                  |  |
| 9                                 | Participation on a Data Safety Monitoring Board or Advisory Board                                            | None                                                                                                  |  |
| 10                                | Leadership or fiduciary role in other board, society,                                                        | None                                                                                                  |  |

|    |                                                                                  |      |  |
|----|----------------------------------------------------------------------------------|------|--|
|    | committee or advocacy group, paid or unpaid                                      |      |  |
| 11 | Stock or stock options                                                           | None |  |
|    |                                                                                  |      |  |
|    |                                                                                  |      |  |
| 12 | Receipt of equipment, materials, drugs, medical writing, gifts or other services | None |  |
|    |                                                                                  |      |  |
|    |                                                                                  |      |  |
| 13 | Other financial or non-financial interests                                       | None |  |
|    |                                                                                  |      |  |
|    |                                                                                  |      |  |

**Please summarize the above conflict of interest in the following box:**

This study was supported by National Natural Science Foundation of China (No. 81871518 and 81901522), the China Postdoctoral Science Foundation (No. 2019M661730 and 2020M671347), the Natural Science Foundation of Jiangsu Province (No. BK20200602, BE2020634, and BK20191138), the Fundamental Research Funds for the Central Universities (No. JUSRP11955), the Top Talent Support Program for Young and Middle-aged People of Wuxi Health Committee (No. BJ2020049), and the Wuxi Commission of Health (No. T201824) .

**Please place an “X” next to the following statement to indicate your agreement:**

**X   I certify that I have answered every question and have not altered the wording of any of the questions on this form.**

## ICMJE DISCLOSURE FORM

**Date: April 11, 2021**

**Your Name: Sihao Jin**

**Manuscript Title: Itaconate ameliorates methicillin-resistant *Staphylococcus aureus*-induced acute lung injury through the Nrf2/ARE pathway**

**Manuscript number (if known): ATM-21-1448**

In the interest of transparency, we ask you to disclose all relationships/activities/interests listed below that are related to the content of your manuscript. "Related" means any relation with for-profit or not-for-profit third parties whose interests may be affected by the content of the manuscript. Disclosure represents a commitment to transparency and does not necessarily indicate a bias. If you are in doubt about whether to list a relationship/activity/interest, it is preferable that you do so.

The following questions apply to the author's relationships/activities/interests as they relate to the current manuscript only.

The author's relationships/activities/interests should be defined broadly. For example, if your manuscript pertains to the epidemiology of hypertension, you should declare all relationships with manufacturers of antihypertensive medication, even if that medication is not mentioned in the manuscript.

In item #1 below, report all support for the work reported in this manuscript without time limit. For all other items, the time frame for disclosure is the past 36 months.

|                                                           |                                                                                                                                                                                | Name all entities with whom you have this relationship or indicate none (add rows as needed)                                                                                                                                                                                                                                             | Specifications/Comments (e.g., if payments were made to you or to your institution) |
|-----------------------------------------------------------|--------------------------------------------------------------------------------------------------------------------------------------------------------------------------------|------------------------------------------------------------------------------------------------------------------------------------------------------------------------------------------------------------------------------------------------------------------------------------------------------------------------------------------|-------------------------------------------------------------------------------------|
| <b>Time frame: Since the initial planning of the work</b> |                                                                                                                                                                                |                                                                                                                                                                                                                                                                                                                                          |                                                                                     |
| 1                                                         | All support for the present manuscript (e.g., funding, provision of study materials, medical writing, article processing charges, etc.)<br><b>No time limit for this item.</b> | National Natural Science Foundation of China<br>No. 81871518<br><br>National Natural Science Foundation of China<br>No. 81901522<br><br>China Postdoctoral Science Foundation<br>No. 2019M661730<br><br>China Postdoctoral Science Foundation<br>No. 2020M671347<br><br>Natural Science Foundation of Jiangsu Province<br>No. BK20200602 |                                                                                     |

|                                   |                                                                                                              |                                                                                                       |  |
|-----------------------------------|--------------------------------------------------------------------------------------------------------------|-------------------------------------------------------------------------------------------------------|--|
|                                   |                                                                                                              | Natural Science Foundation of Jiangsu Province<br>No. BE2020634                                       |  |
|                                   |                                                                                                              | Natural Science Foundation of Jiangsu Province<br>No. BK20191138                                      |  |
|                                   |                                                                                                              | Fundamental Research Funds for the Central Universities<br>No. JUSRP11955                             |  |
|                                   |                                                                                                              | Top Talent Support Program for Young and Middle-aged People of Wuxi Health Committee<br>No. BJ2020049 |  |
|                                   |                                                                                                              | Wuxi Commission of Health<br>No. T201824                                                              |  |
| <b>Time frame: past 36 months</b> |                                                                                                              |                                                                                                       |  |
| 2                                 | Grants or contracts from any entity (if not indicated in item #1 above).                                     | None                                                                                                  |  |
| 3                                 | Royalties or licenses                                                                                        | None                                                                                                  |  |
| 4                                 | Consulting fees                                                                                              | None                                                                                                  |  |
| 5                                 | Payment or honoraria for lectures, presentations, speakers bureaus, manuscript writing or educational events | None                                                                                                  |  |
| 6                                 | Payment for expert testimony                                                                                 | None                                                                                                  |  |
| 7                                 | Support for attending meetings and/or travel                                                                 | None                                                                                                  |  |
| 8                                 | Patents planned, issued or pending                                                                           | None                                                                                                  |  |
| 9                                 | Participation on a Data Safety Monitoring Board or Advisory Board                                            | None                                                                                                  |  |
| 10                                | Leadership or fiduciary role in other board, society,                                                        | None                                                                                                  |  |



|    |                                                                                  |      |  |
|----|----------------------------------------------------------------------------------|------|--|
|    | committee or advocacy group, paid or unpaid                                      |      |  |
| 11 | Stock or stock options                                                           | None |  |
|    |                                                                                  |      |  |
|    |                                                                                  |      |  |
| 12 | Receipt of equipment, materials, drugs, medical writing, gifts or other services | None |  |
|    |                                                                                  |      |  |
|    |                                                                                  |      |  |
| 13 | Other financial or non-financial interests                                       | None |  |
|    |                                                                                  |      |  |
|    |                                                                                  |      |  |

**Please summarize the above conflict of interest in the following box:**

This study was supported by National Natural Science Foundation of China (No. 81871518 and 81901522), the China Postdoctoral Science Foundation (No. 2019M661730 and 2020M671347), the Natural Science Foundation of Jiangsu Province (No. BK20200602, BE2020634, and BK20191138), the Fundamental Research Funds for the Central Universities (No. JUSRP11955), the Top Talent Support Program for Young and Middle-aged People of Wuxi Health Committee (No. BJ2020049), and the Wuxi Commission of Health (No. T201824) .

**Please place an “X” next to the following statement to indicate your agreement:**

**X   I certify that I have answered every question and have not altered the wording of any of the questions on this form.**

## ICMJE DISCLOSURE FORM

**Date: April 11, 2021**

**Your Name: Jiaojiao Sun**

**Manuscript Title: Itaconate ameliorates methicillin-resistant *Staphylococcus aureus*-induced acute lung injury through the Nrf2/ARE pathway**

**Manuscript number (if known): ATM-21-1448**

In the interest of transparency, we ask you to disclose all relationships/activities/interests listed below that are related to the content of your manuscript. "Related" means any relation with for-profit or not-for-profit third parties whose interests may be affected by the content of the manuscript. Disclosure represents a commitment to transparency and does not necessarily indicate a bias. If you are in doubt about whether to list a relationship/activity/interest, it is preferable that you do so.

The following questions apply to the author's relationships/activities/interests as they relate to the current manuscript only.

The author's relationships/activities/interests should be defined broadly. For example, if your manuscript pertains to the epidemiology of hypertension, you should declare all relationships with manufacturers of antihypertensive medication, even if that medication is not mentioned in the manuscript.

In item #1 below, report all support for the work reported in this manuscript without time limit. For all other items, the time frame for disclosure is the past 36 months.

|                                                           |                                                                                                                                                                                | Name all entities with whom you have this relationship or indicate none (add rows as needed)                                                                                                                                                                                                                                             | Specifications/Comments (e.g., if payments were made to you or to your institution) |
|-----------------------------------------------------------|--------------------------------------------------------------------------------------------------------------------------------------------------------------------------------|------------------------------------------------------------------------------------------------------------------------------------------------------------------------------------------------------------------------------------------------------------------------------------------------------------------------------------------|-------------------------------------------------------------------------------------|
| <b>Time frame: Since the initial planning of the work</b> |                                                                                                                                                                                |                                                                                                                                                                                                                                                                                                                                          |                                                                                     |
| 1                                                         | All support for the present manuscript (e.g., funding, provision of study materials, medical writing, article processing charges, etc.)<br><b>No time limit for this item.</b> | National Natural Science Foundation of China<br>No. 81871518<br><br>National Natural Science Foundation of China<br>No. 81901522<br><br>China Postdoctoral Science Foundation<br>No. 2019M661730<br><br>China Postdoctoral Science Foundation<br>No. 2020M671347<br><br>Natural Science Foundation of Jiangsu Province<br>No. BK20200602 |                                                                                     |

|                                   |                                                                                                              |                                                                                                       |  |
|-----------------------------------|--------------------------------------------------------------------------------------------------------------|-------------------------------------------------------------------------------------------------------|--|
|                                   |                                                                                                              | Natural Science Foundation of Jiangsu Province<br>No. BE2020634                                       |  |
|                                   |                                                                                                              | Natural Science Foundation of Jiangsu Province<br>No. BK20191138                                      |  |
|                                   |                                                                                                              | Fundamental Research Funds for the Central Universities<br>No. JUSRP11955                             |  |
|                                   |                                                                                                              | Top Talent Support Program for Young and Middle-aged People of Wuxi Health Committee<br>No. BJ2020049 |  |
|                                   |                                                                                                              | Wuxi Commission of Health<br>No. T201824                                                              |  |
| <b>Time frame: past 36 months</b> |                                                                                                              |                                                                                                       |  |
| 2                                 | Grants or contracts from any entity (if not indicated in item #1 above).                                     | None                                                                                                  |  |
| 3                                 | Royalties or licenses                                                                                        | None                                                                                                  |  |
| 4                                 | Consulting fees                                                                                              | None                                                                                                  |  |
| 5                                 | Payment or honoraria for lectures, presentations, speakers bureaus, manuscript writing or educational events | None                                                                                                  |  |
| 6                                 | Payment for expert testimony                                                                                 | None                                                                                                  |  |
| 7                                 | Support for attending meetings and/or travel                                                                 | None                                                                                                  |  |
| 8                                 | Patents planned, issued or pending                                                                           | None                                                                                                  |  |
| 9                                 | Participation on a Data Safety Monitoring Board or Advisory Board                                            | None                                                                                                  |  |
| 10                                | Leadership or fiduciary role in other board, society,                                                        | None                                                                                                  |  |

|    |                                                                                  |      |  |
|----|----------------------------------------------------------------------------------|------|--|
|    | committee or advocacy group, paid or unpaid                                      |      |  |
| 11 | Stock or stock options                                                           | None |  |
|    |                                                                                  |      |  |
|    |                                                                                  |      |  |
| 12 | Receipt of equipment, materials, drugs, medical writing, gifts or other services | None |  |
|    |                                                                                  |      |  |
|    |                                                                                  |      |  |
| 13 | Other financial or non-financial interests                                       | None |  |
|    |                                                                                  |      |  |
|    |                                                                                  |      |  |

**Please summarize the above conflict of interest in the following box:**

This study was supported by National Natural Science Foundation of China (No. 81871518 and 81901522), the China Postdoctoral Science Foundation (No. 2019M661730 and 2020M671347), the Natural Science Foundation of Jiangsu Province (No. BK20200602, BE2020634, and BK20191138), the Fundamental Research Funds for the Central Universities (No. JUSRP11955), the Top Talent Support Program for Young and Middle-aged People of Wuxi Health Committee (No. BJ2020049), and the Wuxi Commission of Health (No. T201824) .

**Please place an “X” next to the following statement to indicate your agreement:**

**I certify that I have answered every question and have not altered the wording of any of the questions on this form.**

## ICMJE DISCLOSURE FORM

Date: April 11, 2021

Your Name: Bin-Bin Wan

Manuscript Title: Itaconate ameliorates methicillin-resistant *Staphylococcus aureus*-induced acute lung injury through the Nrf2/ARE pathway

Manuscript number (if known): ATM-21-1448

In the interest of transparency, we ask you to disclose all relationships/activities/interests listed below that are related to the content of your manuscript. "Related" means any relation with for-profit or not-for-profit third parties whose interests may be affected by the content of the manuscript. Disclosure represents a commitment to transparency and does not necessarily indicate a bias. If you are in doubt about whether to list a relationship/activity/interest, it is preferable that you do so.

The following questions apply to the author's relationships/activities/interests as they relate to the current manuscript only.

The author's relationships/activities/interests should be defined broadly. For example, if your manuscript pertains to the epidemiology of hypertension, you should declare all relationships with manufacturers of antihypertensive medication, even if that medication is not mentioned in the manuscript.

In item #1 below, report all support for the work reported in this manuscript without time limit. For all other items, the time frame for disclosure is the past 36 months.

|                                                           |                                                                                                                                                                                | Name all entities with whom you have this relationship or indicate none (add rows as needed)                                                                                                                                                                                                                                             | Specifications/Comments (e.g., if payments were made to you or to your institution) |
|-----------------------------------------------------------|--------------------------------------------------------------------------------------------------------------------------------------------------------------------------------|------------------------------------------------------------------------------------------------------------------------------------------------------------------------------------------------------------------------------------------------------------------------------------------------------------------------------------------|-------------------------------------------------------------------------------------|
| <b>Time frame: Since the initial planning of the work</b> |                                                                                                                                                                                |                                                                                                                                                                                                                                                                                                                                          |                                                                                     |
| 1                                                         | All support for the present manuscript (e.g., funding, provision of study materials, medical writing, article processing charges, etc.)<br><b>No time limit for this item.</b> | National Natural Science Foundation of China<br>No. 81871518<br><br>National Natural Science Foundation of China<br>No. 81901522<br><br>China Postdoctoral Science Foundation<br>No. 2019M661730<br><br>China Postdoctoral Science Foundation<br>No. 2020M671347<br><br>Natural Science Foundation of Jiangsu Province<br>No. BK20200602 |                                                                                     |

|                                   |                                                                                                              |                                                                                                       |  |
|-----------------------------------|--------------------------------------------------------------------------------------------------------------|-------------------------------------------------------------------------------------------------------|--|
|                                   |                                                                                                              | Natural Science Foundation of Jiangsu Province<br>No. BE2020634                                       |  |
|                                   |                                                                                                              | Natural Science Foundation of Jiangsu Province<br>No. BK20191138                                      |  |
|                                   |                                                                                                              | Fundamental Research Funds for the Central Universities<br>No. JUSRP11955                             |  |
|                                   |                                                                                                              | Top Talent Support Program for Young and Middle-aged People of Wuxi Health Committee<br>No. BJ2020049 |  |
|                                   |                                                                                                              | Wuxi Commission of Health<br>No. T201824                                                              |  |
| <b>Time frame: past 36 months</b> |                                                                                                              |                                                                                                       |  |
| 2                                 | Grants or contracts from any entity (if not indicated in item #1 above).                                     | None                                                                                                  |  |
| 3                                 | Royalties or licenses                                                                                        | None                                                                                                  |  |
| 4                                 | Consulting fees                                                                                              | None                                                                                                  |  |
| 5                                 | Payment or honoraria for lectures, presentations, speakers bureaus, manuscript writing or educational events | None                                                                                                  |  |
| 6                                 | Payment for expert testimony                                                                                 | None                                                                                                  |  |
| 7                                 | Support for attending meetings and/or travel                                                                 | None                                                                                                  |  |
| 8                                 | Patents planned, issued or pending                                                                           | None                                                                                                  |  |
| 9                                 | Participation on a Data Safety Monitoring Board or Advisory Board                                            | None                                                                                                  |  |
| 10                                | Leadership or fiduciary role in other board, society,                                                        | None                                                                                                  |  |

|    |                                                                                  |      |  |
|----|----------------------------------------------------------------------------------|------|--|
|    | committee or advocacy group, paid or unpaid                                      |      |  |
| 11 | Stock or stock options                                                           | None |  |
|    |                                                                                  |      |  |
|    |                                                                                  |      |  |
| 12 | Receipt of equipment, materials, drugs, medical writing, gifts or other services | None |  |
|    |                                                                                  |      |  |
|    |                                                                                  |      |  |
| 13 | Other financial or non-financial interests                                       | None |  |
|    |                                                                                  |      |  |
|    |                                                                                  |      |  |

**Please summarize the above conflict of interest in the following box:**

This study was supported by National Natural Science Foundation of China (No. 81871518 and 81901522), the China Postdoctoral Science Foundation (No. 2019M661730 and 2020M671347), the Natural Science Foundation of Jiangsu Province (No. BK20200602, BE2020634, and BK20191138), the Fundamental Research Funds for the Central Universities (No. JUSRP11955), the Top Talent Support Program for Young and Middle-aged People of Wuxi Health Committee (No. BJ2020049), and the Wuxi Commission of Health (No. T201824) .

**Please place an “X” next to the following statement to indicate your agreement:**

**X   I certify that I have answered every question and have not altered the wording of any of the questions on this form.**

## ICMJE DISCLOSURE FORM

**Date: April 11, 2021**

**Your Name: Jiru Zhang**

**Manuscript Title: Itaconate ameliorates methicillin-resistant *Staphylococcus aureus*-induced acute lung injury through the Nrf2/ARE pathway**

**Manuscript number (if known): ATM-21-1448**

In the interest of transparency, we ask you to disclose all relationships/activities/interests listed below that are related to the content of your manuscript. "Related" means any relation with for-profit or not-for-profit third parties whose interests may be affected by the content of the manuscript. Disclosure represents a commitment to transparency and does not necessarily indicate a bias. If you are in doubt about whether to list a relationship/activity/interest, it is preferable that you do so.

The following questions apply to the author's relationships/activities/interests as they relate to the current manuscript only.

The author's relationships/activities/interests should be defined broadly. For example, if your manuscript pertains to the epidemiology of hypertension, you should declare all relationships with manufacturers of antihypertensive medication, even if that medication is not mentioned in the manuscript.

In item #1 below, report all support for the work reported in this manuscript without time limit. For all other items, the time frame for disclosure is the past 36 months.

|                                                           |                                                                                                                                                                                | Name all entities with whom you have this relationship or indicate none (add rows as needed)                                                                                                                                                                                                                                             | Specifications/Comments (e.g., if payments were made to you or to your institution) |
|-----------------------------------------------------------|--------------------------------------------------------------------------------------------------------------------------------------------------------------------------------|------------------------------------------------------------------------------------------------------------------------------------------------------------------------------------------------------------------------------------------------------------------------------------------------------------------------------------------|-------------------------------------------------------------------------------------|
| <b>Time frame: Since the initial planning of the work</b> |                                                                                                                                                                                |                                                                                                                                                                                                                                                                                                                                          |                                                                                     |
| 1                                                         | All support for the present manuscript (e.g., funding, provision of study materials, medical writing, article processing charges, etc.)<br><b>No time limit for this item.</b> | National Natural Science Foundation of China<br>No. 81871518<br><br>National Natural Science Foundation of China<br>No. 81901522<br><br>China Postdoctoral Science Foundation<br>No. 2019M661730<br><br>China Postdoctoral Science Foundation<br>No. 2020M671347<br><br>Natural Science Foundation of Jiangsu Province<br>No. BK20200602 |                                                                                     |



|                                   |                                                                                                              |                                                                                                       |  |
|-----------------------------------|--------------------------------------------------------------------------------------------------------------|-------------------------------------------------------------------------------------------------------|--|
|                                   |                                                                                                              | Natural Science Foundation of Jiangsu Province<br>No. BE2020634                                       |  |
|                                   |                                                                                                              | Natural Science Foundation of Jiangsu Province<br>No. BK20191138                                      |  |
|                                   |                                                                                                              | Fundamental Research Funds for the Central Universities<br>No. JUSRP11955                             |  |
|                                   |                                                                                                              | Top Talent Support Program for Young and Middle-aged People of Wuxi Health Committee<br>No. BJ2020049 |  |
|                                   |                                                                                                              | Wuxi Commission of Health<br>No. T201824                                                              |  |
| <b>Time frame: past 36 months</b> |                                                                                                              |                                                                                                       |  |
| 2                                 | Grants or contracts from any entity (if not indicated in item #1 above).                                     | None                                                                                                  |  |
| 3                                 | Royalties or licenses                                                                                        | None                                                                                                  |  |
| 4                                 | Consulting fees                                                                                              | None                                                                                                  |  |
| 5                                 | Payment or honoraria for lectures, presentations, speakers bureaus, manuscript writing or educational events | None                                                                                                  |  |
| 6                                 | Payment for expert testimony                                                                                 | None                                                                                                  |  |
| 7                                 | Support for attending meetings and/or travel                                                                 | None                                                                                                  |  |
| 8                                 | Patents planned, issued or pending                                                                           | None                                                                                                  |  |
| 9                                 | Participation on a Data Safety Monitoring Board or Advisory Board                                            | None                                                                                                  |  |
| 10                                | Leadership or fiduciary role in other board, society,                                                        | None                                                                                                  |  |

|    |                                                                                  |      |  |
|----|----------------------------------------------------------------------------------|------|--|
|    | committee or advocacy group, paid or unpaid                                      |      |  |
| 11 | Stock or stock options                                                           | None |  |
|    |                                                                                  |      |  |
|    |                                                                                  |      |  |
| 12 | Receipt of equipment, materials, drugs, medical writing, gifts or other services | None |  |
|    |                                                                                  |      |  |
|    |                                                                                  |      |  |
| 13 | Other financial or non-financial interests                                       | None |  |
|    |                                                                                  |      |  |
|    |                                                                                  |      |  |

**Please summarize the above conflict of interest in the following box:**

This study was supported by National Natural Science Foundation of China (No. 81871518 and 81901522), the China Postdoctoral Science Foundation (No. 2019M661730 and 2020M671347), the Natural Science Foundation of Jiangsu Province (No. BK20200602, BE2020634, and BK20191138), the Fundamental Research Funds for the Central Universities (No. JUSRP11955), the Top Talent Support Program for Young and Middle-aged People of Wuxi Health Committee (No. BJ2020049), and the Wuxi Commission of Health (No. T201824) .

**Please place an “X” next to the following statement to indicate your agreement:**

**I certify that I have answered every question and have not altered the wording of any of the questions on this form.**

## ICMJE DISCLOSURE FORM

**Date: April 11, 2021**

**Your Name: Yingying Wang**

**Manuscript Title: Itaconate ameliorates methicillin-resistant *Staphylococcus aureus*-induced acute lung injury through the Nrf2/ARE pathway**

**Manuscript number (if known): ATM-21-1448**

In the interest of transparency, we ask you to disclose all relationships/activities/interests listed below that are related to the content of your manuscript. "Related" means any relation with for-profit or not-for-profit third parties whose interests may be affected by the content of the manuscript. Disclosure represents a commitment to transparency and does not necessarily indicate a bias. If you are in doubt about whether to list a relationship/activity/interest, it is preferable that you do so.

The following questions apply to the author's relationships/activities/interests as they relate to the current manuscript only.

The author's relationships/activities/interests should be defined broadly. For example, if your manuscript pertains to the epidemiology of hypertension, you should declare all relationships with manufacturers of antihypertensive medication, even if that medication is not mentioned in the manuscript.

In item #1 below, report all support for the work reported in this manuscript without time limit. For all other items, the time frame for disclosure is the past 36 months.

|                                                           |                                                                                                                                                                                | Name all entities with whom you have this relationship or indicate none (add rows as needed)                                                                                                                                                                                                                                             | Specifications/Comments (e.g., if payments were made to you or to your institution) |
|-----------------------------------------------------------|--------------------------------------------------------------------------------------------------------------------------------------------------------------------------------|------------------------------------------------------------------------------------------------------------------------------------------------------------------------------------------------------------------------------------------------------------------------------------------------------------------------------------------|-------------------------------------------------------------------------------------|
| <b>Time frame: Since the initial planning of the work</b> |                                                                                                                                                                                |                                                                                                                                                                                                                                                                                                                                          |                                                                                     |
| 1                                                         | All support for the present manuscript (e.g., funding, provision of study materials, medical writing, article processing charges, etc.)<br><b>No time limit for this item.</b> | National Natural Science Foundation of China<br>No. 81871518<br><br>National Natural Science Foundation of China<br>No. 81901522<br><br>China Postdoctoral Science Foundation<br>No. 2019M661730<br><br>China Postdoctoral Science Foundation<br>No. 2020M671347<br><br>Natural Science Foundation of Jiangsu Province<br>No. BK20200602 |                                                                                     |

|                                   |                                                                                                              |                                                                                                       |  |
|-----------------------------------|--------------------------------------------------------------------------------------------------------------|-------------------------------------------------------------------------------------------------------|--|
|                                   |                                                                                                              | Natural Science Foundation of Jiangsu Province<br>No. BE2020634                                       |  |
|                                   |                                                                                                              | Natural Science Foundation of Jiangsu Province<br>No. BK20191138                                      |  |
|                                   |                                                                                                              | Fundamental Research Funds for the Central Universities<br>No. JUSRP11955                             |  |
|                                   |                                                                                                              | Top Talent Support Program for Young and Middle-aged People of Wuxi Health Committee<br>No. BJ2020049 |  |
|                                   |                                                                                                              | Wuxi Commission of Health<br>No. T201824                                                              |  |
| <b>Time frame: past 36 months</b> |                                                                                                              |                                                                                                       |  |
| 2                                 | Grants or contracts from any entity (if not indicated in item #1 above).                                     | None                                                                                                  |  |
| 3                                 | Royalties or licenses                                                                                        | None                                                                                                  |  |
| 4                                 | Consulting fees                                                                                              | None                                                                                                  |  |
| 5                                 | Payment or honoraria for lectures, presentations, speakers bureaus, manuscript writing or educational events | None                                                                                                  |  |
| 6                                 | Payment for expert testimony                                                                                 | None                                                                                                  |  |
| 7                                 | Support for attending meetings and/or travel                                                                 | None                                                                                                  |  |
| 8                                 | Patents planned, issued or pending                                                                           | None                                                                                                  |  |
| 9                                 | Participation on a Data Safety Monitoring Board or Advisory Board                                            | None                                                                                                  |  |
| 10                                | Leadership or fiduciary role in other board, society,                                                        | None                                                                                                  |  |

|    |                                                                                  |      |  |
|----|----------------------------------------------------------------------------------|------|--|
|    | committee or advocacy group, paid or unpaid                                      |      |  |
| 11 | Stock or stock options                                                           | None |  |
|    |                                                                                  |      |  |
|    |                                                                                  |      |  |
| 12 | Receipt of equipment, materials, drugs, medical writing, gifts or other services | None |  |
|    |                                                                                  |      |  |
|    |                                                                                  |      |  |
| 13 | Other financial or non-financial interests                                       | None |  |
|    |                                                                                  |      |  |
|    |                                                                                  |      |  |

**Please summarize the above conflict of interest in the following box:**

This study was supported by National Natural Science Foundation of China (No. 81871518 and 81901522), the China Postdoctoral Science Foundation (No. 2019M661730 and 2020M671347), the Natural Science Foundation of Jiangsu Province (No. BK20200602, BE2020634, and BK20191138), the Fundamental Research Funds for the Central Universities (No. JUSRP11955), the Top Talent Support Program for Young and Middle-aged People of Wuxi Health Committee (No. BJ2020049), and the Wuxi Commission of Health (No. T201824) .

**Please place an “X” next to the following statement to indicate your agreement:**

**X   I certify that I have answered every question and have not altered the wording of any of the questions on this form.**

## ICMJE DISCLOSURE FORM

Date: April 11, 2021

Your Name: Zhi-Qi Gao

Manuscript Title: Itaconate ameliorates methicillin-resistant *Staphylococcus aureus*-induced acute lung injury through the Nrf2/ARE pathway

Manuscript number (if known): ATM-21-1448

In the interest of transparency, we ask you to disclose all relationships/activities/interests listed below that are related to the content of your manuscript. "Related" means any relation with for-profit or not-for-profit third parties whose interests may be affected by the content of the manuscript. Disclosure represents a commitment to transparency and does not necessarily indicate a bias. If you are in doubt about whether to list a relationship/activity/interest, it is preferable that you do so.

The following questions apply to the author's relationships/activities/interests as they relate to the current manuscript only.

The author's relationships/activities/interests should be defined broadly. For example, if your manuscript pertains to the epidemiology of hypertension, you should declare all relationships with manufacturers of antihypertensive medication, even if that medication is not mentioned in the manuscript.

In item #1 below, report all support for the work reported in this manuscript without time limit. For all other items, the time frame for disclosure is the past 36 months.

|                                                           |                                                                                                                                                                                | Name all entities with whom you have this relationship or indicate none (add rows as needed)                                                                                                                                                                                                                                             | Specifications/Comments (e.g., if payments were made to you or to your institution) |
|-----------------------------------------------------------|--------------------------------------------------------------------------------------------------------------------------------------------------------------------------------|------------------------------------------------------------------------------------------------------------------------------------------------------------------------------------------------------------------------------------------------------------------------------------------------------------------------------------------|-------------------------------------------------------------------------------------|
| <b>Time frame: Since the initial planning of the work</b> |                                                                                                                                                                                |                                                                                                                                                                                                                                                                                                                                          |                                                                                     |
| 1                                                         | All support for the present manuscript (e.g., funding, provision of study materials, medical writing, article processing charges, etc.)<br><b>No time limit for this item.</b> | National Natural Science Foundation of China<br>No. 81871518<br><br>National Natural Science Foundation of China<br>No. 81901522<br><br>China Postdoctoral Science Foundation<br>No. 2019M661730<br><br>China Postdoctoral Science Foundation<br>No. 2020M671347<br><br>Natural Science Foundation of Jiangsu Province<br>No. BK20200602 |                                                                                     |

|                                   |                                                                                                              |                                                                                                       |  |
|-----------------------------------|--------------------------------------------------------------------------------------------------------------|-------------------------------------------------------------------------------------------------------|--|
|                                   |                                                                                                              | Natural Science Foundation of Jiangsu Province<br>No. BE2020634                                       |  |
|                                   |                                                                                                              | Natural Science Foundation of Jiangsu Province<br>No. BK20191138                                      |  |
|                                   |                                                                                                              | Fundamental Research Funds for the Central Universities<br>No. JUSRP11955                             |  |
|                                   |                                                                                                              | Top Talent Support Program for Young and Middle-aged People of Wuxi Health Committee<br>No. BJ2020049 |  |
|                                   |                                                                                                              | Wuxi Commission of Health<br>No. T201824                                                              |  |
| <b>Time frame: past 36 months</b> |                                                                                                              |                                                                                                       |  |
| 2                                 | Grants or contracts from any entity (if not indicated in item #1 above).                                     | None                                                                                                  |  |
| 3                                 | Royalties or licenses                                                                                        | None                                                                                                  |  |
| 4                                 | Consulting fees                                                                                              | None                                                                                                  |  |
| 5                                 | Payment or honoraria for lectures, presentations, speakers bureaus, manuscript writing or educational events | None                                                                                                  |  |
| 6                                 | Payment for expert testimony                                                                                 | None                                                                                                  |  |
| 7                                 | Support for attending meetings and/or travel                                                                 | None                                                                                                  |  |
| 8                                 | Patents planned, issued or pending                                                                           | None                                                                                                  |  |
| 9                                 | Participation on a Data Safety Monitoring Board or Advisory Board                                            | None                                                                                                  |  |
| 10                                | Leadership or fiduciary role in other board, society,                                                        | None                                                                                                  |  |

|    |                                                                                  |      |  |
|----|----------------------------------------------------------------------------------|------|--|
|    | committee or advocacy group, paid or unpaid                                      |      |  |
| 11 | Stock or stock options                                                           | None |  |
|    |                                                                                  |      |  |
|    |                                                                                  |      |  |
| 12 | Receipt of equipment, materials, drugs, medical writing, gifts or other services | None |  |
|    |                                                                                  |      |  |
|    |                                                                                  |      |  |
| 13 | Other financial or non-financial interests                                       | None |  |
|    |                                                                                  |      |  |
|    |                                                                                  |      |  |

**Please summarize the above conflict of interest in the following box:**

This study was supported by National Natural Science Foundation of China (No. 81871518 and 81901522), the China Postdoctoral Science Foundation (No. 2019M661730 and 2020M671347), the Natural Science Foundation of Jiangsu Province (No. BK20200602, BE2020634, and BK20191138), the Fundamental Research Funds for the Central Universities (No. JUSRP11955), the Top Talent Support Program for Young and Middle-aged People of Wuxi Health Committee (No. BJ2020049), and the Wuxi Commission of Health (No. T201824) .

**Please place an “X” next to the following statement to indicate your agreement:**

**X   I certify that I have answered every question and have not altered the wording of any of the questions on this form.**



## ICMJE DISCLOSURE FORM

**Date:** April 11, 2021

**Your Name:** Dan Chen

**Manuscript Title:** Itaconate ameliorates methicillin-resistant *Staphylococcus aureus*-induced acute lung injury through the Nrf2/ARE pathway

**Manuscript number (if known):** ATM-21-1448

In the interest of transparency, we ask you to disclose all relationships/activities/interests listed below that are related to the content of your manuscript. "Related" means any relation with for-profit or not-for-profit third parties whose interests may be affected by the content of the manuscript. Disclosure represents a commitment to transparency and does not necessarily indicate a bias. If you are in doubt about whether to list a relationship/activity/interest, it is preferable that you do so.

The following questions apply to the author's relationships/activities/interests as they relate to the current manuscript only.

The author's relationships/activities/interests should be defined broadly. For example, if your manuscript pertains to the epidemiology of hypertension, you should declare all relationships with manufacturers of antihypertensive medication, even if that medication is not mentioned in the manuscript.

In item #1 below, report all support for the work reported in this manuscript without time limit. For all other items, the time frame for disclosure is the past 36 months.

|                                                           |                                                                                                                                                                                | Name all entities with whom you have this relationship or indicate none (add rows as needed)                                                                                                                                                                                                                                             | Specifications/Comments (e.g., if payments were made to you or to your institution) |
|-----------------------------------------------------------|--------------------------------------------------------------------------------------------------------------------------------------------------------------------------------|------------------------------------------------------------------------------------------------------------------------------------------------------------------------------------------------------------------------------------------------------------------------------------------------------------------------------------------|-------------------------------------------------------------------------------------|
| <b>Time frame: Since the initial planning of the work</b> |                                                                                                                                                                                |                                                                                                                                                                                                                                                                                                                                          |                                                                                     |
| 1                                                         | All support for the present manuscript (e.g., funding, provision of study materials, medical writing, article processing charges, etc.)<br><b>No time limit for this item.</b> | National Natural Science Foundation of China<br>No. 81871518<br><br>National Natural Science Foundation of China<br>No. 81901522<br><br>China Postdoctoral Science Foundation<br>No. 2019M661730<br><br>China Postdoctoral Science Foundation<br>No. 2020M671347<br><br>Natural Science Foundation of Jiangsu Province<br>No. BK20200602 |                                                                                     |

|                                   |                                                                                                              |                                                                                                       |  |
|-----------------------------------|--------------------------------------------------------------------------------------------------------------|-------------------------------------------------------------------------------------------------------|--|
|                                   |                                                                                                              | Natural Science Foundation of Jiangsu Province<br>No. BE2020634                                       |  |
|                                   |                                                                                                              | Natural Science Foundation of Jiangsu Province<br>No. BK20191138                                      |  |
|                                   |                                                                                                              | Fundamental Research Funds for the Central Universities<br>No. JUSRP11955                             |  |
|                                   |                                                                                                              | Top Talent Support Program for Young and Middle-aged People of Wuxi Health Committee<br>No. BJ2020049 |  |
|                                   |                                                                                                              | Wuxi Commission of Health<br>No. T201824                                                              |  |
| <b>Time frame: past 36 months</b> |                                                                                                              |                                                                                                       |  |
| 2                                 | Grants or contracts from any entity (if not indicated in item #1 above).                                     | None                                                                                                  |  |
| 3                                 | Royalties or licenses                                                                                        | None                                                                                                  |  |
| 4                                 | Consulting fees                                                                                              | None                                                                                                  |  |
| 5                                 | Payment or honoraria for lectures, presentations, speakers bureaus, manuscript writing or educational events | None                                                                                                  |  |
| 6                                 | Payment for expert testimony                                                                                 | None                                                                                                  |  |
| 7                                 | Support for attending meetings and/or travel                                                                 | None                                                                                                  |  |
| 8                                 | Patents planned, issued or pending                                                                           | None                                                                                                  |  |
| 9                                 | Participation on a Data Safety Monitoring Board or Advisory Board                                            | None                                                                                                  |  |
| 10                                | Leadership or fiduciary role in other board, society,                                                        | None                                                                                                  |  |

|    |                                                                                  |      |  |
|----|----------------------------------------------------------------------------------|------|--|
|    | committee or advocacy group, paid or unpaid                                      |      |  |
| 11 | Stock or stock options                                                           | None |  |
|    |                                                                                  |      |  |
|    |                                                                                  |      |  |
| 12 | Receipt of equipment, materials, drugs, medical writing, gifts or other services | None |  |
|    |                                                                                  |      |  |
|    |                                                                                  |      |  |
| 13 | Other financial or non-financial interests                                       | None |  |
|    |                                                                                  |      |  |
|    |                                                                                  |      |  |

**Please summarize the above conflict of interest in the following box:**

This study was supported by National Natural Science Foundation of China (No. 81871518 and 81901522), the China Postdoctoral Science Foundation (No. 2019M661730 and 2020M671347), the Natural Science Foundation of Jiangsu Province (No. BK20200602, BE2020634, and BK20191138), the Fundamental Research Funds for the Central Universities (No. JUSRP11955), the Top Talent Support Program for Young and Middle-aged People of Wuxi Health Committee (No. BJ2020049), and the Wuxi Commission of Health (No. T201824) .

**Please place an “X” next to the following statement to indicate your agreement:**

**X** I certify that I have answered every question and have not altered the wording of any of the questions on this form.

## ICMJE DISCLOSURE FORM

**Date: April 11, 2021**

**Your Name: Shengpeng Li**

**Manuscript Title: Itaconate ameliorates methicillin-resistant *Staphylococcus aureus*-induced acute lung injury through the Nrf2/ARE pathway**

**Manuscript number (if known): ATM-21-1448**

In the interest of transparency, we ask you to disclose all relationships/activities/interests listed below that are related to the content of your manuscript. "Related" means any relation with for-profit or not-for-profit third parties whose interests may be affected by the content of the manuscript. Disclosure represents a commitment to transparency and does not necessarily indicate a bias. If you are in doubt about whether to list a relationship/activity/interest, it is preferable that you do so.

The following questions apply to the author's relationships/activities/interests as they relate to the current manuscript only.

The author's relationships/activities/interests should be defined broadly. For example, if your manuscript pertains to the epidemiology of hypertension, you should declare all relationships with manufacturers of antihypertensive medication, even if that medication is not mentioned in the manuscript.

In item #1 below, report all support for the work reported in this manuscript without time limit. For all other items, the time frame for disclosure is the past 36 months.

|                                                           |                                                                                                                                                                                | Name all entities with whom you have this relationship or indicate none (add rows as needed)                                                                                                                                                                                                                                             | Specifications/Comments (e.g., if payments were made to you or to your institution) |
|-----------------------------------------------------------|--------------------------------------------------------------------------------------------------------------------------------------------------------------------------------|------------------------------------------------------------------------------------------------------------------------------------------------------------------------------------------------------------------------------------------------------------------------------------------------------------------------------------------|-------------------------------------------------------------------------------------|
| <b>Time frame: Since the initial planning of the work</b> |                                                                                                                                                                                |                                                                                                                                                                                                                                                                                                                                          |                                                                                     |
| 1                                                         | All support for the present manuscript (e.g., funding, provision of study materials, medical writing, article processing charges, etc.)<br><b>No time limit for this item.</b> | National Natural Science Foundation of China<br>No. 81871518<br><br>National Natural Science Foundation of China<br>No. 81901522<br><br>China Postdoctoral Science Foundation<br>No. 2019M661730<br><br>China Postdoctoral Science Foundation<br>No. 2020M671347<br><br>Natural Science Foundation of Jiangsu Province<br>No. BK20200602 |                                                                                     |

|                                   |                                                                                                              |                                                                                                       |  |
|-----------------------------------|--------------------------------------------------------------------------------------------------------------|-------------------------------------------------------------------------------------------------------|--|
|                                   |                                                                                                              | Natural Science Foundation of Jiangsu Province<br>No. BE2020634                                       |  |
|                                   |                                                                                                              | Natural Science Foundation of Jiangsu Province<br>No. BK20191138                                      |  |
|                                   |                                                                                                              | Fundamental Research Funds for the Central Universities<br>No. JUSRP11955                             |  |
|                                   |                                                                                                              | Top Talent Support Program for Young and Middle-aged People of Wuxi Health Committee<br>No. BJ2020049 |  |
|                                   |                                                                                                              | Wuxi Commission of Health<br>No. T201824                                                              |  |
| <b>Time frame: past 36 months</b> |                                                                                                              |                                                                                                       |  |
| 2                                 | Grants or contracts from any entity (if not indicated in item #1 above).                                     | None                                                                                                  |  |
| 3                                 | Royalties or licenses                                                                                        | None                                                                                                  |  |
| 4                                 | Consulting fees                                                                                              | None                                                                                                  |  |
| 5                                 | Payment or honoraria for lectures, presentations, speakers bureaus, manuscript writing or educational events | None                                                                                                  |  |
| 6                                 | Payment for expert testimony                                                                                 | None                                                                                                  |  |
| 7                                 | Support for attending meetings and/or travel                                                                 | None                                                                                                  |  |
| 8                                 | Patents planned, issued or pending                                                                           | None                                                                                                  |  |
| 9                                 | Participation on a Data Safety Monitoring Board or Advisory Board                                            | None                                                                                                  |  |
| 10                                | Leadership or fiduciary role in other board, society,                                                        | None                                                                                                  |  |

|    |                                                                                  |      |  |
|----|----------------------------------------------------------------------------------|------|--|
|    | committee or advocacy group, paid or unpaid                                      |      |  |
| 11 | Stock or stock options                                                           | None |  |
|    |                                                                                  |      |  |
|    |                                                                                  |      |  |
| 12 | Receipt of equipment, materials, drugs, medical writing, gifts or other services | None |  |
|    |                                                                                  |      |  |
|    |                                                                                  |      |  |
| 13 | Other financial or non-financial interests                                       | None |  |
|    |                                                                                  |      |  |
|    |                                                                                  |      |  |

**Please summarize the above conflict of interest in the following box:**

This study was supported by National Natural Science Foundation of China (No. 81871518 and 81901522), the China Postdoctoral Science Foundation (No. 2019M661730 and 2020M671347), the Natural Science Foundation of Jiangsu Province (No. BK20200602, BE2020634, and BK20191138), the Fundamental Research Funds for the Central Universities (No. JUSRP11955), the Top Talent Support Program for Young and Middle-aged People of Wuxi Health Committee (No. BJ2020049), and the Wuxi Commission of Health (No. T201824) .

**Please place an “X” next to the following statement to indicate your agreement:**

**X   I certify that I have answered every question and have not altered the wording of any of the questions on this form.**

## ICMJE DISCLOSURE FORM

Date: April 11, 2021

Your Name: Qingfeng Pang

Manuscript Title: Itaconate ameliorates methicillin-resistant *Staphylococcus aureus*-induced acute lung injury through the Nrf2/ARE pathway

Manuscript number (if known): ATM-21-1448

In the interest of transparency, we ask you to disclose all relationships/activities/interests listed below that are related to the content of your manuscript. "Related" means any relation with for-profit or not-for-profit third parties whose interests may be affected by the content of the manuscript. Disclosure represents a commitment to transparency and does not necessarily indicate a bias. If you are in doubt about whether to list a relationship/activity/interest, it is preferable that you do so.

The following questions apply to the author's relationships/activities/interests as they relate to the current manuscript only.

The author's relationships/activities/interests should be defined broadly. For example, if your manuscript pertains to the epidemiology of hypertension, you should declare all relationships with manufacturers of antihypertensive medication, even if that medication is not mentioned in the manuscript.

In item #1 below, report all support for the work reported in this manuscript without time limit. For all other items, the time frame for disclosure is the past 36 months.

|                                                           |                                                                                                                                                                                | Name all entities with whom you have this relationship or indicate none (add rows as needed)                                                                                                                                                                                                                                             | Specifications/Comments (e.g., if payments were made to you or to your institution) |
|-----------------------------------------------------------|--------------------------------------------------------------------------------------------------------------------------------------------------------------------------------|------------------------------------------------------------------------------------------------------------------------------------------------------------------------------------------------------------------------------------------------------------------------------------------------------------------------------------------|-------------------------------------------------------------------------------------|
| <b>Time frame: Since the initial planning of the work</b> |                                                                                                                                                                                |                                                                                                                                                                                                                                                                                                                                          |                                                                                     |
| 1                                                         | All support for the present manuscript (e.g., funding, provision of study materials, medical writing, article processing charges, etc.)<br><b>No time limit for this item.</b> | National Natural Science Foundation of China<br>No. 81871518<br><br>National Natural Science Foundation of China<br>No. 81901522<br><br>China Postdoctoral Science Foundation<br>No. 2019M661730<br><br>China Postdoctoral Science Foundation<br>No. 2020M671347<br><br>Natural Science Foundation of Jiangsu Province<br>No. BK20200602 |                                                                                     |

|                                   |                                                                                                              |                                                                                                       |  |
|-----------------------------------|--------------------------------------------------------------------------------------------------------------|-------------------------------------------------------------------------------------------------------|--|
|                                   |                                                                                                              | Natural Science Foundation of Jiangsu Province<br>No. BE2020634                                       |  |
|                                   |                                                                                                              | Natural Science Foundation of Jiangsu Province<br>No. BK20191138                                      |  |
|                                   |                                                                                                              | Fundamental Research Funds for the Central Universities<br>No. JUSRP11955                             |  |
|                                   |                                                                                                              | Top Talent Support Program for Young and Middle-aged People of Wuxi Health Committee<br>No. BJ2020049 |  |
|                                   |                                                                                                              | Wuxi Commission of Health<br>No. T201824                                                              |  |
| <b>Time frame: past 36 months</b> |                                                                                                              |                                                                                                       |  |
| 2                                 | Grants or contracts from any entity (if not indicated in item #1 above).                                     | None                                                                                                  |  |
| 3                                 | Royalties or licenses                                                                                        | None                                                                                                  |  |
| 4                                 | Consulting fees                                                                                              | None                                                                                                  |  |
| 5                                 | Payment or honoraria for lectures, presentations, speakers bureaus, manuscript writing or educational events | None                                                                                                  |  |
| 6                                 | Payment for expert testimony                                                                                 | None                                                                                                  |  |
| 7                                 | Support for attending meetings and/or travel                                                                 | None                                                                                                  |  |
| 8                                 | Patents planned, issued or pending                                                                           | None                                                                                                  |  |
| 9                                 | Participation on a Data Safety Monitoring Board or Advisory Board                                            | None                                                                                                  |  |
| 10                                | Leadership or fiduciary role in other board, society,                                                        | None                                                                                                  |  |



|    |                                                                                  |      |  |
|----|----------------------------------------------------------------------------------|------|--|
|    | committee or advocacy group, paid or unpaid                                      |      |  |
| 11 | Stock or stock options                                                           | None |  |
|    |                                                                                  |      |  |
|    |                                                                                  |      |  |
| 12 | Receipt of equipment, materials, drugs, medical writing, gifts or other services | None |  |
|    |                                                                                  |      |  |
|    |                                                                                  |      |  |
| 13 | Other financial or non-financial interests                                       | None |  |
|    |                                                                                  |      |  |
|    |                                                                                  |      |  |

**Please summarize the above conflict of interest in the following box:**

This study was supported by National Natural Science Foundation of China (No. 81871518 and 81901522), the China Postdoctoral Science Foundation (No. 2019M661730 and 2020M671347), the Natural Science Foundation of Jiangsu Province (No. BK20200602, BE2020634, and BK20191138), the Fundamental Research Funds for the Central Universities (No. JUSRP11955), the Top Talent Support Program for Young and Middle-aged People of Wuxi Health Committee (No. BJ2020049), and the Wuxi Commission of Health (No. T201824) .

**Please place an “X” next to the following statement to indicate your agreement:**

**X  I certify that I have answered every question and have not altered the wording of any of the questions on this form.**

## ICMJE DISCLOSURE FORM

Date: April 11, 2021

Your Name: Zhiqiang Wang

Manuscript Title: Itaconate ameliorates methicillin-resistant *Staphylococcus aureus*-induced acute lung injury through the Nrf2/ARE pathway

Manuscript number (if known): ATM-21-1448

In the interest of transparency, we ask you to disclose all relationships/activities/interests listed below that are related to the content of your manuscript. "Related" means any relation with for-profit or not-for-profit third parties whose interests may be affected by the content of the manuscript. Disclosure represents a commitment to transparency and does not necessarily indicate a bias. If you are in doubt about whether to list a relationship/activity/interest, it is preferable that you do so.

The following questions apply to the author's relationships/activities/interests as they relate to the current manuscript only.

The author's relationships/activities/interests should be defined broadly. For example, if your manuscript pertains to the epidemiology of hypertension, you should declare all relationships with manufacturers of antihypertensive medication, even if that medication is not mentioned in the manuscript.

In item #1 below, report all support for the work reported in this manuscript without time limit. For all other items, the time frame for disclosure is the past 36 months.

|                                                           |                                                                                                                                                                                | Name all entities with whom you have this relationship or indicate none (add rows as needed)                                                                                                                                                                                                                                             | Specifications/Comments (e.g., if payments were made to you or to your institution) |
|-----------------------------------------------------------|--------------------------------------------------------------------------------------------------------------------------------------------------------------------------------|------------------------------------------------------------------------------------------------------------------------------------------------------------------------------------------------------------------------------------------------------------------------------------------------------------------------------------------|-------------------------------------------------------------------------------------|
| <b>Time frame: Since the initial planning of the work</b> |                                                                                                                                                                                |                                                                                                                                                                                                                                                                                                                                          |                                                                                     |
| 1                                                         | All support for the present manuscript (e.g., funding, provision of study materials, medical writing, article processing charges, etc.)<br><b>No time limit for this item.</b> | National Natural Science Foundation of China<br>No. 81871518<br><br>National Natural Science Foundation of China<br>No. 81901522<br><br>China Postdoctoral Science Foundation<br>No. 2019M661730<br><br>China Postdoctoral Science Foundation<br>No. 2020M671347<br><br>Natural Science Foundation of Jiangsu Province<br>No. BK20200602 |                                                                                     |

|                                   |                                                                                                              |                                                                                                       |  |
|-----------------------------------|--------------------------------------------------------------------------------------------------------------|-------------------------------------------------------------------------------------------------------|--|
|                                   |                                                                                                              | Natural Science Foundation of Jiangsu Province<br>No. BE2020634                                       |  |
|                                   |                                                                                                              | Natural Science Foundation of Jiangsu Province<br>No. BK20191138                                      |  |
|                                   |                                                                                                              | Fundamental Research Funds for the Central Universities<br>No. JUSRP11955                             |  |
|                                   |                                                                                                              | Top Talent Support Program for Young and Middle-aged People of Wuxi Health Committee<br>No. BJ2020049 |  |
|                                   |                                                                                                              | Wuxi Commission of Health<br>No. T201824                                                              |  |
| <b>Time frame: past 36 months</b> |                                                                                                              |                                                                                                       |  |
| 2                                 | Grants or contracts from any entity (if not indicated in item #1 above).                                     | None                                                                                                  |  |
| 3                                 | Royalties or licenses                                                                                        | None                                                                                                  |  |
| 4                                 | Consulting fees                                                                                              | None                                                                                                  |  |
| 5                                 | Payment or honoraria for lectures, presentations, speakers bureaus, manuscript writing or educational events | None                                                                                                  |  |
| 6                                 | Payment for expert testimony                                                                                 | None                                                                                                  |  |
| 7                                 | Support for attending meetings and/or travel                                                                 | None                                                                                                  |  |
| 8                                 | Patents planned, issued or pending                                                                           | None                                                                                                  |  |
| 9                                 | Participation on a Data Safety Monitoring Board or Advisory Board                                            | None                                                                                                  |  |
| 10                                | Leadership or fiduciary role in other board, society,                                                        | None                                                                                                  |  |

|    |                                                                                  |      |  |
|----|----------------------------------------------------------------------------------|------|--|
|    | committee or advocacy group, paid or unpaid                                      |      |  |
| 11 | Stock or stock options                                                           | None |  |
|    |                                                                                  |      |  |
|    |                                                                                  |      |  |
| 12 | Receipt of equipment, materials, drugs, medical writing, gifts or other services | None |  |
|    |                                                                                  |      |  |
|    |                                                                                  |      |  |
| 13 | Other financial or non-financial interests                                       | None |  |
|    |                                                                                  |      |  |
|    |                                                                                  |      |  |

**Please summarize the above conflict of interest in the following box:**

This study was supported by National Natural Science Foundation of China (No. 81871518 and 81901522), the China Postdoctoral Science Foundation (No. 2019M661730 and 2020M671347), the Natural Science Foundation of Jiangsu Province (No. BK20200602, BE2020634, and BK20191138), the Fundamental Research Funds for the Central Universities (No. JUSRP11955), the Top Talent Support Program for Young and Middle-aged People of Wuxi Health Committee (No. BJ2020049), and the Wuxi Commission of Health (No. T201824) .

**Please place an “X” next to the following statement to indicate your agreement:**

**X   I certify that I have answered every question and have not altered the wording of any of the questions on this form.**
